# Supplementary material for: Size of the hydrogen bond network in liquid methanol: a quantum cluster equilibrium model with extensive structure search
Source: Royal Society of Chemistry journal article supplement (doi:10.1039/d1cp00427a), 2021-01-01
Supplement: d1cp00427a1.pdf [file d1cp00427a1.pdf]

## Electronic Supplementary Information

# Size of the Hydrogen Bond Network in Liquid Methanol: A Quantum Cluster Equilibrium Model with Extensive Structure Search

Soon Teh<sup>†‡</sup>, Po-Jen Hsu<sup>\*†</sup>, Jer-Lai Kuo<sup>\*†</sup>

<sup>†</sup>*Institute of Atomic and Molecular Sciences, Academia Sinica, Taipei 10617, Taiwan.*

<sup>‡</sup>Current address: *Experimental Quantum Information Physics Unit, Okinawa Institute of Science and Technology Graduate University, Okinawa, Japan*

\* Corresponding authors: pjhsu@gate.sinica.edu.tw (P.-J.H), jlkuo@pub.iams.sinica.edu.tw (J.-L.K.).

## Contents

- Table S1** The local minima of the cluster size  $n=1-13$  sorted by the counterpoise corrected energies ( $E_0+E_{cp}$ ) at B3LYP/6-31+G(d,p).
- Table S2** The local minima of the cluster size  $n=1-14$  sorted by the counterpoise corrected energies ( $E_0+E_{cp}$ ) at B3LYP+D3/6-31+G(d,p).
- Table S3** The local minima of the cluster size  $n=1-13$  sorted by the electronic energies ( $E_0$ ) at MP2/6-31+G(d,p).
- Table S4** The local minima of the cluster size  $n=1-9$  sorted by the counterpoise corrected energies ( $E_0+E_{cp}$ ) at MP2/6-311++G(d,p).
- Table S5** The cluster probabilities and the partition functions of the MP2/6-31+G(d, p) dataset at 340 K.
- Figure S1** Parameter optimization implemented in PyQCE.
- Figure S2** Temperature-dependent cluster probabilities at MP2-CP/6-311++G(d,p) excluding the **8-II** structure.

**Table S1** The local minima of the cluster size  $n=1-13$  sorted by the counterpoise corrected energies ( $E_0+E_{cp}$ ) in Hartree at B3LYP/6-31+G(d,p). The cluster probabilities and the natural logarithms of the four cluster partition functions were computed at 300 K. Those with a probability lower than 0.0001 were not shown (e.g.,  $n>13$ ). The cluster indices ( $n-i$ ) cannot be cross-referenced in the other tables.

| $n-i$ | $E_0$      | $E_0+E_{zpe}$ | $E_0+E_{cp}$ | $E_0+E_{cp}+E_{zpe}$ | $E_{bind}$ | $P(300K)$ | $\ln q_{i,elec}$ | $\ln q_{i,vib}$ | $\ln q_{i,rot}$ | $\ln q_{i,trans}$ |
|-------|------------|---------------|--------------|----------------------|------------|-----------|------------------|-----------------|-----------------|-------------------|
| 1-1   | -115.73487 | -115.68363    | -115.73487   | -115.68363           | 0.00000    | 0.00170   | 5.03007          | -53.67002       | 8.07300         | 60.64010          |
| 2-1   | -231.47914 | -231.37447    | -231.47793   | -231.37326           | -0.00300   | 0.00036   | 18.67823         | -102.26136      | 11.46844        | 61.67982          |
| 3-1   | -347.23226 | -347.07284    | -347.22977   | -347.07035           | -0.00649   | 0.00030   | 41.56787         | -156.18379      | 13.01924        | 62.28802          |
| 3-2   | -347.23079 | -347.07170    | -347.22841   | -347.06933           | -0.00615   | 0.00010   | 40.14160         | -154.76780      | 11.93652        | 62.28802          |
| 4-1   | -462.98894 | -462.77547    | -462.98386   | -462.77039           | -0.00897   | 0.00803   | 66.83095         | -207.24998      | 13.11982        | 62.71954          |
| 4-2   | -462.98715 | -462.77392    | -462.98224   | -462.76901           | -0.00862   | 0.00877   | 65.12730         | -206.15910      | 13.82124        | 62.71954          |
| 5-1   | -578.73957 | -578.47284    | -578.73271   | -578.46598           | -0.00957   | 0.17832   | 86.57102         | -254.11932      | 14.51821        | 63.05426          |
| 5-2   | -578.73348 | -578.46675    | -578.72717   | -578.46044           | -0.00846   | 0.00013   | 80.73849         | -255.50226      | 14.48984        | 63.05426          |
| 5-3   | -578.73263 | -578.46593    | -578.72633   | -578.45962           | -0.00830   | 0.00030   | 79.85134         | -253.78061      | 14.51974        | 63.05426          |
| 5-7   | -578.73138 | -578.46482    | -578.72523   | -578.45868           | -0.00811   | 0.00014   | 78.69794         | -253.39808      | 14.53085        | 63.05426          |
| 5-9   | -578.73102 | -578.46470    | -578.72504   | -578.45872           | -0.00811   | 0.00044   | 78.49526         | -252.12790      | 14.59044        | 63.05426          |
| 6-1   | -694.49008 | -694.16994    | -694.48169   | -694.16155           | -0.00996   | 0.03805   | 106.44861        | -303.75982      | 14.00709        | 63.32774          |
| 6-2   | -694.48805 | -694.16823    | -694.47986   | -694.16004           | -0.00971   | 0.16943   | 104.52955        | -301.42657      | 15.08651        | 63.32774          |
| 6-3   | -694.48781 | -694.16784    | -694.47955   | -694.15958           | -0.00963   | 0.03372   | 104.19889        | -302.72643      | 15.10282        | 63.32774          |
| 6-4   | -694.48433 | -694.16421    | -694.47620   | -694.15608           | -0.00905   | 0.00056   | 100.67737        | -303.24915      | 15.04205        | 63.32774          |
| 6-5   | -694.48418 | -694.16389    | -694.47605   | -694.15576           | -0.00900   | 0.00015   | 100.51795        | -304.38639      | 15.04101        | 63.32774          |
| 6-6   | -694.48390 | -694.16381    | -694.47586   | -694.15577           | -0.00900   | 0.00026   | 100.31791        | -303.68042      | 15.06213        | 63.32774          |
| 6-7   | -694.48376 | -694.16367    | -694.47570   | -694.15561           | -0.00897   | 0.00077   | 100.14534        | -302.43003      | 15.07929        | 63.32774          |
| 6-8   | -694.48383 | -694.16368    | -694.47570   | -694.15555           | -0.00896   | 0.00018   | 100.14429        | -303.90997      | 15.07780        | 63.32774          |
| 6-9   | -694.48375 | -694.16366    | -694.47566   | -694.15557           | -0.00897   | 0.00028   | 100.10575        | -303.40592      | 15.07347        | 63.32774          |
| 6-11  | -694.48336 | -694.16340    | -694.47530   | -694.15534           | -0.00893   | 0.00085   | 99.72462         | -301.91407      | 15.08005        | 63.32774          |
| 6-15  | -694.48063 | -694.16038    | -694.47314   | -694.15289           | -0.00852   | 0.00016   | 97.45205         | -301.31830      | 15.11466        | 63.32774          |
| 6-59  | -694.46809 | -694.14966    | -694.46180   | -694.14337           | -0.00693   | 0.01996   | 85.51692         | -286.55874      | 17.09256        | 63.32774          |
| 7-1   | -810.23754 | -809.86437    | -810.22785   | -809.85468           | -0.00990   | 0.21237   | 123.36625        | -349.22350      | 15.61380        | 63.55897          |
| 7-2   | -810.23748 | -809.86424    | -810.22781   | -809.85457           | -0.00988   | 0.08727   | 123.31732        | -350.06571      | 15.61561        | 63.55897          |
| 7-3   | -810.23732 | -809.86372    | -810.22741   | -809.85381           | -0.00977   | 0.00834   | 122.89788        | -351.90394      | 15.52498        | 63.55897          |
| 7-4   | -810.23719 | -809.86363    | -810.22730   | -809.85375           | -0.00976   | 0.00975   | 122.78669        | -351.64109      | 15.52999        | 63.55897          |
| 7-5   | -810.23669 | -809.86302    | -810.22679   | -809.85313           | -0.00968   | 0.00246   | 122.25175        | -352.45285      | 15.50087        | 63.55897          |
| 7-6   | -810.23665 | -809.86292    | -810.22670   | -809.85297           | -0.00965   | 0.00174   | 122.15216        | -352.67325      | 15.47273        | 63.55897          |
| 7-7   | -810.23653 | -809.86299    | -810.22667   | -809.85313           | -0.00968   | 0.00669   | 122.11802        | -351.30942      | 15.49026        | 63.55897          |
| 7-8   | -810.23419 | -809.86072    | -810.22456   | -809.85110           | -0.00939   | 0.00070   | 119.90246        | -351.44451      | 15.58911        | 63.55897          |
| 7-9   | -810.23409 | -809.86049    | -810.22447   | -809.85087           | -0.00935   | 0.00024   | 119.80812        | -352.42651      | 15.58057        | 63.55897          |
| 7-10  | -810.23402 | -809.86042    | -810.22438   | -809.85078           | -0.00934   | 0.00020   | 119.70985        | -352.49141      | 15.57476        | 63.55897          |
| 7-16  | -810.23294 | -809.85940    | -810.22324   | -809.84970           | -0.00919   | 0.00011   | 118.51604        | -351.82616      | 15.53214        | 63.55897          |
| 7-17  | -810.23283 | -809.85936    | -810.22319   | -809.84971           | -0.00919   | 0.00018   | 118.45681        | -351.28550      | 15.51316        | 63.55897          |

|      |             |             |             |             |          |         |           |            |          |          |
|------|-------------|-------------|-------------|-------------|----------|---------|-----------|------------|----------|----------|
| 7-18 | -810.23270  | -809.85933  | -810.22310  | -809.84973  | -0.00919 | 0.00053 | 118.36333 | -350.13096 | 15.53404 | 63.55897 |
| 7-21 | -810.23238  | -809.85913  | -810.22289  | -809.84964  | -0.00918 | 0.00039 | 118.14665 | -350.24603 | 15.56489 | 63.55897 |
| 7-22 | -810.23225  | -809.85897  | -810.22279  | -809.84951  | -0.00916 | 0.00082 | 118.03987 | -349.38043 | 15.54388 | 63.55897 |
| 7-24 | -810.23223  | -809.85856  | -810.22271  | -809.84904  | -0.00909 | 0.00016 | 117.95045 | -350.98065 | 15.56826 | 63.55897 |
| 8-1  | -925.98651  | -925.55989  | -925.97540  | -925.54878  | -0.00997 | 0.01075 | 141.73668 | -398.29866 | 14.72750 | 63.75926 |
| 8-2  | -925.98581  | -925.55895  | -925.97450  | -925.54764  | -0.00983 | 0.00474 | 140.78925 | -399.41612 | 15.97391 | 63.75926 |
| 8-3  | -925.98561  | -925.55892  | -925.97447  | -925.54777  | -0.00984 | 0.01125 | 140.76056 | -398.54338 | 15.99380 | 63.75926 |
| 8-4  | -925.98563  | -925.55901  | -925.97442  | -925.54780  | -0.00985 | 0.01334 | 140.71232 | -398.30989 | 15.97919 | 63.75926 |
| 8-6  | -925.98556  | -925.55873  | -925.97422  | -925.54739  | -0.00980 | 0.00311 | 140.49993 | -399.54220 | 15.96746 | 63.75926 |
| 8-7  | -925.98563  | -925.55855  | -925.97422  | -925.54713  | -0.00976 | 0.00110 | 140.49223 | -400.52117 | 15.91119 | 63.75926 |
| 8-8  | -925.98532  | -925.55798  | -925.97369  | -925.54634  | -0.00966 | 0.00016 | 139.93470 | -401.79982 | 15.85028 | 63.75926 |
| 8-10 | -925.98475  | -925.55784  | -925.97342  | -925.54651  | -0.00969 | 0.00059 | 139.65263 | -400.36335 | 15.96494 | 63.75926 |
| 8-14 | -925.98217  | -925.55540  | -925.97110  | -925.54433  | -0.00941 | 0.00024 | 137.21355 | -398.86625 | 16.00362 | 63.75926 |
| 8-15 | -925.98202  | -925.55528  | -925.97106  | -925.54432  | -0.00941 | 0.00027 | 137.17188 | -398.71134 | 16.00875 | 63.75926 |
| 8-17 | -925.98191  | -925.55522  | -925.97098  | -925.54428  | -0.00941 | 0.00032 | 137.08646 | -398.42533 | 15.99932 | 63.75926 |
| 8-19 | -925.98190  | -925.55518  | -925.97092  | -925.54420  | -0.00940 | 0.00031 | 137.02005 | -398.43976 | 16.02186 | 63.75926 |
| 8-20 | -925.98186  | -925.55524  | -925.97090  | -925.54428  | -0.00941 | 0.00030 | 137.00011 | -398.42372 | 16.01514 | 63.75926 |
| 8-26 | -925.98160  | -925.55493  | -925.97074  | -925.54407  | -0.00938 | 0.00059 | 136.83280 | -397.57753 | 16.01266 | 63.75926 |
| 8-27 | -925.98166  | -925.55497  | -925.97070  | -925.54402  | -0.00937 | 0.00026 | 136.79492 | -398.37883 | 16.02130 | 63.75926 |
| 8-36 | -925.98147  | -925.55481  | -925.97053  | -925.54387  | -0.00935 | 0.00020 | 136.60816 | -398.41216 | 15.99860 | 63.75926 |
| 9-3  | -1041.73429 | -1041.25414 | -1041.72159 | -1041.24144 | -0.00986 | 0.00274 | 158.68301 | -446.82334 | 16.37198 | 63.93594 |
| 9-4  | -1041.73424 | -1041.25391 | -1041.72146 | -1041.24113 | -0.00983 | 0.00118 | 158.55075 | -447.49776 | 16.33811 | 63.93594 |
| 9-5  | -1041.73413 | -1041.25397 | -1041.72146 | -1041.24130 | -0.00985 | 0.00249 | 158.54190 | -446.75001 | 16.34450 | 63.93594 |
| 9-7  | -1041.73387 | -1041.25399 | -1041.72127 | -1041.24139 | -0.00986 | 0.01078 | 158.34137 | -445.14950 | 16.40864 | 63.93594 |
| 9-10 | -1041.73362 | -1041.25312 | -1041.72080 | -1041.24030 | -0.00974 | 0.00014 | 157.85657 | -448.89417 | 16.30894 | 63.93594 |
| 9-11 | -1041.73361 | -1041.25307 | -1041.72061 | -1041.24007 | -0.00971 | 0.00013 | 157.65184 | -448.72885 | 16.26347 | 63.93594 |
| 9-13 | -1041.73312 | -1041.25287 | -1041.72039 | -1041.24014 | -0.00972 | 0.00052 | 157.42224 | -447.20595 | 16.35539 | 63.93594 |
| 9-14 | -1041.73268 | -1041.25310 | -1041.72030 | -1041.24073 | -0.00979 | 0.02420 | 157.32597 | -443.31938 | 16.40287 | 63.93594 |
| 9-15 | -1041.73271 | -1041.25312 | -1041.72030 | -1041.24071 | -0.00978 | 0.04904 | 157.32438 | -442.60252 | 16.39367 | 63.93594 |
| 9-16 | -1041.73306 | -1041.25276 | -1041.72022 | -1041.23992 | -0.00970 | 0.00030 | 157.23588 | -447.54584 | 16.31435 | 63.93594 |
| 9-17 | -1041.73279 | -1041.25285 | -1041.72020 | -1041.24025 | -0.00973 | 0.00333 | 157.21892 | -445.13508 | 16.34113 | 63.93594 |
| 9-19 | -1041.73277 | -1041.25261 | -1041.72008 | -1041.23992 | -0.00970 | 0.00079 | 157.09775 | -446.42522 | 16.31379 | 63.93594 |
| 9-20 | -1041.73275 | -1041.25250 | -1041.71998 | -1041.23973 | -0.00968 | 0.00018 | 156.99101 | -447.81058 | 16.30554 | 63.93594 |
| 9-21 | -1041.73265 | -1041.25251 | -1041.71996 | -1041.23982 | -0.00968 | 0.00048 | 156.96401 | -446.81355 | 16.33189 | 63.93594 |
| 9-23 | -1041.73266 | -1041.25264 | -1041.71989 | -1041.23988 | -0.00969 | 0.00215 | 156.89636 | -445.19851 | 16.29118 | 63.93594 |
| 9-24 | -1041.73272 | -1041.25244 | -1041.71987 | -1041.23960 | -0.00966 | 0.00012 | 156.87380 | -448.01625 | 16.25345 | 63.93594 |
| 9-25 | -1041.73249 | -1041.25228 | -1041.71980 | -1041.23959 | -0.00966 | 0.00034 | 156.80143 | -446.96738 | 16.30224 | 63.93594 |
| 9-32 | -1041.73068 | -1041.25092 | -1041.71842 | -1041.23866 | -0.00956 | 0.00122 | 155.34212 | -444.37060 | 16.45122 | 63.93594 |
| 9-33 | -1041.73068 | -1041.25086 | -1041.71842 | -1041.23860 | -0.00955 | 0.00050 | 155.34193 | -445.26593 | 16.44658 | 63.93594 |
| 9-63 | -1041.73010 | -1041.25020 | -1041.71772 | -1041.23781 | -0.00946 | 0.00024 | 154.60504 | -445.18319 | 16.37284 | 63.93594 |
| 9-70 | -1041.73008 | -1041.24993 | -1041.71761 | -1041.23746 | -0.00942 | 0.00014 | 154.49761 | -445.62009 | 16.34407 | 63.93594 |

|       |             |             |             |             |          |         |           |            |          |          |
|-------|-------------|-------------|-------------|-------------|----------|---------|-----------|------------|----------|----------|
| 10-2  | -1157.48258 | -1156.94921 | -1157.46847 | -1156.93509 | -0.00988 | 0.00266 | 176.34861 | -493.41813 | 16.73495 | 64.09398 |
| 10-5  | -1157.48254 | -1156.94895 | -1157.46840 | -1156.93481 | -0.00985 | 0.00039 | 176.27607 | -495.21349 | 16.66798 | 64.09398 |
| 10-7  | -1157.48250 | -1156.94904 | -1157.46837 | -1156.93492 | -0.00986 | 0.00181 | 176.25206 | -493.70079 | 16.73047 | 64.09398 |
| 10-11 | -1157.48226 | -1156.94889 | -1157.46816 | -1156.93479 | -0.00985 | 0.00072 | 176.03114 | -494.36006 | 16.69056 | 64.09398 |
| 10-12 | -1157.48229 | -1156.94868 | -1157.46814 | -1156.93453 | -0.00982 | 0.00014 | 176.00707 | -495.95180 | 16.67755 | 64.09398 |
| 10-16 | -1157.48230 | -1156.94865 | -1157.46802 | -1156.93437 | -0.00981 | 0.00011 | 175.87466 | -496.10745 | 16.66771 | 64.09398 |
| 10-18 | -1157.48202 | -1156.94877 | -1157.46794 | -1156.93469 | -0.00984 | 0.00489 | 175.79318 | -492.21181 | 16.69117 | 64.09398 |
| 10-19 | -1157.48215 | -1156.94858 | -1157.46793 | -1156.93437 | -0.00981 | 0.00034 | 175.78856 | -494.89477 | 16.69772 | 64.09398 |
| 10-22 | -1157.48198 | -1156.94845 | -1157.46787 | -1156.93433 | -0.00980 | 0.00027 | 175.72248 | -495.08281 | 16.72759 | 64.09398 |
| 10-24 | -1157.48214 | -1156.94840 | -1157.46783 | -1156.93409 | -0.00978 | 0.00010 | 175.68324 | -495.94074 | 16.67302 | 64.09398 |
| 10-26 | -1157.48189 | -1156.94840 | -1157.46777 | -1156.93428 | -0.00980 | 0.00025 | 175.61859 | -495.04048 | 16.70009 | 64.09398 |
| 10-27 | -1157.48197 | -1156.94831 | -1157.46776 | -1156.93410 | -0.00978 | 0.00016 | 175.60132 | -495.41115 | 16.64317 | 64.09398 |
| 10-28 | -1157.48184 | -1156.94823 | -1157.46775 | -1156.93414 | -0.00979 | 0.00022 | 175.59325 | -495.13072 | 16.69872 | 64.09398 |
| 10-29 | -1157.48190 | -1156.94830 | -1157.46772 | -1156.93411 | -0.00978 | 0.00016 | 175.56341 | -495.41265 | 16.69080 | 64.09398 |
| 10-33 | -1157.48177 | -1156.94820 | -1157.46759 | -1156.93403 | -0.00977 | 0.00023 | 175.42979 | -494.89231 | 16.66537 | 64.09398 |
| 10-37 | -1157.48162 | -1156.94818 | -1157.46754 | -1156.93410 | -0.00978 | 0.00027 | 175.37736 | -494.71017 | 16.70788 | 64.09398 |
| 10-38 | -1157.48177 | -1156.94815 | -1157.46749 | -1156.93387 | -0.00976 | 0.00011 | 175.32332 | -495.51765 | 16.63547 | 64.09398 |
| 10-39 | -1157.48163 | -1156.94800 | -1157.46746 | -1156.93383 | -0.00976 | 0.00011 | 175.29047 | -495.46974 | 16.65777 | 64.09398 |
| 10-55 | -1157.48081 | -1156.94772 | -1157.46696 | -1156.93386 | -0.00976 | 0.00362 | 174.76443 | -491.48321 | 16.69160 | 64.09398 |
| 10-66 | -1157.48090 | -1156.94726 | -1157.46661 | -1156.93297 | -0.00967 | 0.00010 | 174.39857 | -494.63724 | 16.62061 | 64.09398 |
| 10-96 | -1157.47907 | -1156.94507 | -1157.46556 | -1156.93156 | -0.00953 | 0.01067 | 173.28753 | -489.90481 | 17.67096 | 64.09398 |
| 11-6  | -1273.23088 | -1272.64436 | -1273.21543 | -1272.62891 | -0.00991 | 0.01611 | 194.10965 | -538.22823 | 17.07236 | 64.23694 |
| 11-9  | -1273.23090 | -1272.64425 | -1273.21534 | -1272.62869 | -0.00989 | 0.00057 | 194.01087 | -541.38278 | 16.97849 | 64.23694 |
| 11-13 | -1273.23101 | -1272.64398 | -1273.21525 | -1272.62822 | -0.00985 | 0.00014 | 193.91423 | -542.71087 | 16.99762 | 64.23694 |
| 11-21 | -1273.23073 | -1272.64372 | -1273.21499 | -1272.62797 | -0.00982 | 0.00011 | 193.64389 | -542.60917 | 16.96178 | 64.23694 |
| 11-26 | -1273.23049 | -1272.64369 | -1273.21495 | -1272.62815 | -0.00984 | 0.00164 | 193.60143 | -539.90625 | 16.97138 | 64.23694 |
| 11-27 | -1273.23049 | -1272.64372 | -1273.21495 | -1272.62818 | -0.00984 | 0.00145 | 193.60074 | -540.01840 | 16.96551 | 64.23694 |
| 11-37 | -1273.23029 | -1272.64350 | -1273.21478 | -1272.62800 | -0.00983 | 0.00027 | 193.42611 | -541.59901 | 17.01811 | 64.23694 |
| 11-41 | -1273.23016 | -1272.64354 | -1273.21467 | -1272.62804 | -0.00983 | 0.00071 | 193.30699 | -540.48325 | 17.01207 | 64.23694 |
| 11-46 | -1273.23048 | -1272.64355 | -1273.21462 | -1272.62769 | -0.00980 | 0.00024 | 193.25970 | -541.39308 | 16.86237 | 64.23694 |
| 11-54 | -1273.22990 | -1272.64310 | -1273.21447 | -1272.62766 | -0.00980 | 0.00034 | 193.09489 | -541.03180 | 17.03488 | 64.23694 |
| 11-59 | -1273.23021 | -1272.64319 | -1273.21439 | -1272.62737 | -0.00977 | 0.00021 | 193.01112 | -541.30991 | 16.91763 | 64.23694 |
| 11-61 | -1273.22987 | -1272.64310 | -1273.21436 | -1272.62758 | -0.00979 | 0.00030 | 192.97606 | -541.03874 | 17.01949 | 64.23694 |
| 11-62 | -1273.22973 | -1272.64310 | -1273.21435 | -1272.62771 | -0.00980 | 0.00153 | 192.96934 | -539.40051 | 17.03288 | 64.23694 |
| 12-7  | -1388.97961 | -1388.33944 | -1388.96250 | -1388.32234 | -0.00990 | 0.00017 | 211.97970 | -589.37719 | 17.28210 | 64.36746 |
| 12-32 | -1388.97903 | -1388.33888 | -1388.96190 | -1388.32175 | -0.00985 | 0.00018 | 211.35074 | -588.59067 | 17.23026 | 64.36746 |
| 13-12 | -1504.72783 | -1504.03387 | -1504.70916 | -1504.01521 | -0.00985 | 0.00013 | 229.41586 | -635.79926 | 17.52218 | 64.48752 |

**Table S2** The local minima of the cluster size  $n=1-14$  sorted by counterpoise corrected energies ( $E_0+E_{cp}$ ) in Hartree at B3LYP+D3/6-31+G(d,p). The cluster probabilities and the natural logarithms of the four cluster partition functions were computed at 300 K. Those with a probability lower than 0.0001 were not shown. The cluster indices ( $n-i$ ) cannot be cross-referenced in the other tables.

| $n-i$ | $E_0$      | $E_0+E_{zpe}$ | $E_0+E_{cp}$ | $E_0+E_{cp}+E_{zpe}$ | $E_{bind}$ | $P(300K)$ | $\ln q_{i,elec}$ | $\ln q_{i,vib}$ | $\ln q_{i,rot}$ | $\ln q_{i,trans}$ |
|-------|------------|---------------|--------------|----------------------|------------|-----------|------------------|-----------------|-----------------|-------------------|
| 1-1   | -115.73600 | -115.68480    | -115.73600   | -115.68480           | 0.00000    | 0.00024   | 2.36275          | -53.63142       | 8.07490         | 61.39809          |
| 4-1   | -463.00334 | -462.78976    | -462.99805   | -462.78446           | -0.01132   | 0.00371   | 66.35561         | -207.82474      | 13.07373        | 63.47753          |
| 4-2   | -463.00187 | -462.78864    | -462.99668   | -462.78345           | -0.01107   | 0.00910   | 64.91207         | -206.15564      | 13.74666        | 63.47753          |
| 5-1   | -578.75860 | -578.49182    | -578.75139   | -578.48461           | -0.01213   | 0.13008   | 86.97231         | -254.98301      | 14.45269        | 63.81225          |
| 5-2   | -578.75856 | -578.49166    | -578.75131   | -578.48441           | -0.01209   | 0.04772   | 86.88937         | -255.83254      | 14.38227        | 63.81225          |
| 5-3   | -578.75806 | -578.49078    | -578.75090   | -578.48363           | -0.01193   | 0.00221   | 86.46576         | -258.38099      | 14.28015        | 63.81225          |
| 5-4   | -578.75721 | -578.49016    | -578.75009   | -578.48304           | -0.01181   | 0.04010   | 85.60480         | -254.69340      | 14.35378        | 63.81225          |
| 6-1   | -694.51387 | -694.19285    | -694.50474   | -694.18372           | -0.01249   | 0.00355   | 107.60790        | -308.21608      | 14.83107        | 64.08573          |
| 6-2   | -694.51393 | -694.19281    | -694.50466   | -694.18355           | -0.01246   | 0.00258   | 107.52700        | -308.41446      | 14.78857        | 64.08573          |
| 6-3   | -694.51354 | -694.19254    | -694.50447   | -694.18347           | -0.01245   | 0.00201   | 107.31973        | -308.49449      | 14.82992        | 64.08573          |
| 6-4   | -694.51338 | -694.19258    | -694.50444   | -694.18364           | -0.01248   | 0.00541   | 107.28882        | -307.45485      | 14.81006        | 64.08573          |
| 6-5   | -694.51326 | -694.19252    | -694.50428   | -694.18355           | -0.01246   | 0.00474   | 107.12668        | -307.44216      | 14.82708        | 64.08573          |
| 6-6   | -694.51330 | -694.19221    | -694.50419   | -694.18311           | -0.01239   | 0.00209   | 107.03172        | -308.14239      | 14.80183        | 64.08573          |
| 6-7   | -694.51272 | -694.19272    | -694.50403   | -694.18403           | -0.01254   | 0.29378   | 106.85928        | -302.19750      | 13.97624        | 64.08573          |
| 6-8   | -694.51277 | -694.19217    | -694.50384   | -694.18323           | -0.01241   | 0.00747   | 106.65706        | -306.49303      | 14.80187        | 64.08573          |
| 6-10  | -694.51156 | -694.19041    | -694.50271   | -694.18156           | -0.01213   | 0.00011   | 105.47273        | -309.48812      | 14.79820        | 64.08573          |
| 6-11  | -694.51159 | -694.19031    | -694.50262   | -694.18134           | -0.01210   | 0.00010   | 105.37786        | -309.45024      | 14.73125        | 64.08573          |
| 6-13  | -694.51103 | -694.19007    | -694.50211   | -694.18115           | -0.01206   | 0.00017   | 104.83899        | -308.44732      | 14.81519        | 64.08573          |
| 6-14  | -694.51104 | -694.19009    | -694.50209   | -694.18115           | -0.01206   | 0.00013   | 104.81855        | -308.72855      | 14.80245        | 64.08573          |
| 6-15  | -694.51066 | -694.18975    | -694.50193   | -694.18103           | -0.01204   | 0.00017   | 104.65381        | -308.25698      | 14.79804        | 64.08573          |
| 6-18  | -694.51053 | -694.18959    | -694.50185   | -694.18091           | -0.01202   | 0.00012   | 104.56293        | -308.49345      | 14.77907        | 64.08573          |
| 6-21  | -694.50985 | -694.18883    | -694.50110   | -694.18008           | -0.01188   | 0.00012   | 103.77733        | -307.83880      | 14.89019        | 64.08573          |
| 6-22  | -694.50978 | -694.18910    | -694.50102   | -694.18034           | -0.01193   | 0.00018   | 103.69561        | -307.19419      | 14.76089        | 64.08573          |
| 6-24  | -694.50835 | -694.18818    | -694.49988   | -694.17971           | -0.01182   | 0.00549   | 102.49229        | -302.88371      | 15.04965        | 64.08573          |
| 6-70  | -694.48543 | -694.16713    | -694.47896   | -694.16065           | -0.00865   | 0.00069   | 80.47289         | -284.96515      | 17.06972        | 64.08573          |
| 7-1   | -810.26883 | -809.89424    | -810.25792   | -809.88332           | -0.01282   | 0.01194   | 128.05149        | -356.40248      | 15.23747        | 64.31695          |
| 7-2   | -810.26886 | -809.89436    | -810.25789   | -809.88340           | -0.01283   | 0.00849   | 128.02647        | -356.73045      | 15.25034        | 64.31695          |
| 7-3   | -810.26866 | -809.89361    | -810.25774   | -809.88269           | -0.01273   | 0.00027   | 127.87073        | -359.97441      | 15.18324        | 64.31695          |
| 7-4   | -810.26827 | -809.89369    | -810.25738   | -809.88280           | -0.01275   | 0.00185   | 127.48303        | -357.74874      | 15.28957        | 64.31695          |
| 7-5   | -810.26815 | -809.89386    | -810.25734   | -809.88305           | -0.01278   | 0.02440   | 127.44078        | -355.10092      | 15.26175        | 64.31695          |
| 7-6   | -810.26803 | -809.89347    | -810.25725   | -809.88269           | -0.01273   | 0.00132   | 127.35379        | -357.93077      | 15.25757        | 64.31695          |
| 7-8   | -810.26797 | -809.89368    | -810.25709   | -809.88280           | -0.01275   | 0.00498   | 127.18779        | -356.44738      | 15.27169        | 64.31695          |
| 7-9   | -810.26783 | -809.89332    | -810.25704   | -809.88253           | -0.01271   | 0.00361   | 127.12853        | -356.79742      | 15.36031        | 64.31695          |
| 7-10  | -810.26770 | -809.89324    | -810.25691   | -809.88244           | -0.01270   | 0.00205   | 126.98870        | -357.14823      | 15.28181        | 64.31695          |
| 7-11  | -810.26758 | -809.89324    | -810.25690   | -809.88256           | -0.01271   | 0.00327   | 126.97917        | -356.69222      | 15.30409        | 64.31695          |

|       |             |             |             |             |          |         |           |            |          |          |
|-------|-------------|-------------|-------------|-------------|----------|---------|-----------|------------|----------|----------|
| 7-12  | -810.26750  | -809.89292  | -810.25684  | -809.88227  | -0.01267 | 0.00176 | 126.92371 | -357.14561 | 15.19175 | 64.31695 |
| 7-14  | -810.26751  | -809.89267  | -810.25671  | -809.88188  | -0.01262 | 0.00010 | 126.78029 | -359.82817 | 15.17522 | 64.31695 |
| 7-15  | -810.26735  | -809.89304  | -810.25661  | -809.88230  | -0.01268 | 0.00153 | 126.67565 | -357.09820 | 15.25130 | 64.31695 |
| 7-17  | -810.26669  | -809.89276  | -810.25612  | -809.88219  | -0.01266 | 0.02733 | 126.16670 | -353.86739 | 15.41555 | 64.31695 |
| 7-18  | -810.26670  | -809.89204  | -810.25596  | -809.88129  | -0.01253 | 0.00019 | 125.98970 | -358.44561 | 15.20787 | 64.31695 |
| 7-29  | -810.26456  | -809.88992  | -810.25439  | -809.87975  | -0.01231 | 0.00064 | 124.34342 | -355.81814 | 15.44041 | 64.31695 |
| 7-36  | -810.26425  | -809.88983  | -810.25378  | -809.87937  | -0.01226 | 0.00024 | 123.70194 | -356.05539 | 15.31464 | 64.31695 |
| 7-38  | -810.26386  | -809.88963  | -810.25366  | -809.87943  | -0.01227 | 0.00044 | 123.57133 | -355.39230 | 15.39662 | 64.31695 |
| 7-42  | -810.26344  | -809.88950  | -810.25330  | -809.87936  | -0.01226 | 0.00066 | 123.19684 | -354.69162 | 15.48961 | 64.31695 |
| 7-46  | -810.26323  | -809.88946  | -810.25306  | -809.87929  | -0.01225 | 0.00168 | 122.94076 | -353.49199 | 15.47813 | 64.31695 |
| 8-1   | -926.02598  | -925.59723  | -926.01307  | -925.58432  | -0.01324 | 0.00080 | 150.57586 | -409.80666 | 14.92076 | 64.51725 |
| 8-2   | -926.02595  | -925.59745  | -926.01304  | -925.58454  | -0.01327 | 0.00583 | 150.54391 | -407.78995 | 14.91942 | 64.51725 |
| 8-5   | -926.02294  | -925.59484  | -926.01031  | -925.58221  | -0.01298 | 0.00199 | 147.67337 | -406.74660 | 15.67019 | 64.51725 |
| 8-7   | -926.02268  | -925.59440  | -926.01023  | -925.58195  | -0.01295 | 0.00175 | 147.58745 | -406.74444 | 15.62451 | 64.51725 |
| 8-8   | -926.02281  | -925.59479  | -926.01020  | -925.58218  | -0.01298 | 0.00227 | 147.55927 | -406.49970 | 15.67029 | 64.51725 |
| 8-9   | -926.02267  | -925.59415  | -926.01010  | -925.58158  | -0.01290 | 0.00021 | 147.45629 | -408.71979 | 15.59321 | 64.51725 |
| 8-10  | -926.02266  | -925.59448  | -926.01010  | -925.58191  | -0.01294 | 0.00243 | 147.45250 | -406.27762 | 15.62509 | 64.51725 |
| 8-13  | -926.02275  | -925.59433  | -926.01006  | -925.58164  | -0.01291 | 0.00012 | 147.41297 | -409.21870 | 15.55546 | 64.51725 |
| 8-14  | -926.02257  | -925.59423  | -926.01001  | -925.58168  | -0.01291 | 0.00052 | 147.36459 | -407.77780 | 15.66778 | 64.51725 |
| 8-15  | -926.02251  | -925.59435  | -926.00999  | -925.58183  | -0.01293 | 0.00202 | 147.33948 | -406.35340 | 15.62876 | 64.51725 |
| 8-18  | -926.02209  | -925.59417  | -926.00975  | -925.58183  | -0.01293 | 0.00262 | 147.08178 | -405.97252 | 15.76385 | 64.51725 |
| 8-21  | -926.02206  | -925.59385  | -926.00941  | -925.58119  | -0.01285 | 0.00033 | 146.72761 | -407.55323 | 15.63684 | 64.51725 |
| 8-22  | -926.02194  | -925.59358  | -926.00940  | -925.58104  | -0.01284 | 0.00020 | 146.72066 | -408.06340 | 15.62209 | 64.51725 |
| 8-23  | -926.02182  | -925.59345  | -926.00935  | -925.58098  | -0.01283 | 0.00041 | 146.66185 | -407.24705 | 15.60539 | 64.51725 |
| 8-26  | -926.02177  | -925.59331  | -926.00925  | -925.58080  | -0.01280 | 0.00019 | 146.55830 | -407.89612 | 15.60167 | 64.51725 |
| 8-29  | -926.02162  | -925.59322  | -926.00902  | -925.58062  | -0.01278 | 0.00012 | 146.32202 | -408.15770 | 15.63064 | 64.51725 |
| 8-37  | -926.02100  | -925.59323  | -926.00875  | -925.58098  | -0.01283 | 0.00103 | 146.03512 | -405.72030 | 15.62545 | 64.51725 |
| 8-41  | -926.02092  | -925.59273  | -926.00863  | -925.58044  | -0.01276 | 0.00033 | 145.91039 | -406.77075 | 15.64578 | 64.51725 |
| 8-43  | -926.02088  | -925.59269  | -926.00857  | -925.58038  | -0.01275 | 0.00045 | 145.84504 | -406.45407 | 15.72714 | 64.51725 |
| 8-64  | -926.01998  | -925.59172  | -926.00779  | -925.57952  | -0.01265 | 0.00031 | 145.01909 | -406.04424 | 15.75299 | 64.51725 |
| 8-106 | -926.01888  | -925.59074  | -926.00673  | -925.57859  | -0.01253 | 0.00035 | 143.90643 | -404.87862 | 15.83121 | 64.51725 |
| 8-119 | -926.01852  | -925.59049  | -926.00649  | -925.57846  | -0.01251 | 0.00021 | 143.65006 | -405.13128 | 15.81712 | 64.51725 |
| 8-121 | -926.01840  | -925.59049  | -926.00641  | -925.57849  | -0.01252 | 0.00025 | 143.56540 | -404.80054 | 15.74874 | 64.51725 |
| 8-125 | -926.01842  | -925.59051  | -926.00634  | -925.57844  | -0.01251 | 0.00011 | 143.49724 | -405.52573 | 15.75333 | 64.51725 |
| 8-127 | -926.01842  | -925.59067  | -926.00631  | -925.57855  | -0.01252 | 0.00027 | 143.46046 | -404.68896 | 15.81163 | 64.51725 |
| 8-135 | -926.01798  | -925.58937  | -926.00605  | -925.57745  | -0.01239 | 0.00012 | 143.19561 | -405.20068 | 15.82407 | 64.51725 |
| 8-153 | -926.01705  | -925.58942  | -926.00544  | -925.57781  | -0.01243 | 0.00099 | 142.54900 | -402.54729 | 15.90027 | 64.51725 |
| 8-162 | -926.01665  | -925.59017  | -926.00521  | -925.57873  | -0.01255 | 0.08200 | 142.30241 | -396.69243 | 14.70718 | 64.51725 |
| 8-163 | -926.01661  | -925.59015  | -926.00519  | -925.57873  | -0.01255 | 0.16697 | 142.28944 | -396.66351 | 15.40228 | 64.51725 |
| 8-229 | -926.01333  | -925.58633  | -926.00169  | -925.57469  | -0.01204 | 0.00021 | 138.60319 | -400.16313 | 15.89989 | 64.51725 |
| 9-2   | -1041.77989 | -1041.29774 | -1041.76533 | -1041.28318 | -0.01334 | 0.00136 | 170.06441 | -458.25819 | 15.95557 | 64.69393 |

|       |             |             |             |             |          |         |           |            |          |          |
|-------|-------------|-------------|-------------|-------------|----------|---------|-----------|------------|----------|----------|
| 9-6   | -1041.77947 | -1041.29708 | -1041.76493 | -1041.28254 | -0.01326 | 0.00038 | 169.64387 | -459.06625 | 15.91762 | 64.69393 |
| 9-7   | -1041.77931 | -1041.29715 | -1041.76481 | -1041.28265 | -0.01328 | 0.00068 | 169.51420 | -458.39882 | 15.95730 | 64.69393 |
| 9-9   | -1041.77888 | -1041.29652 | -1041.76441 | -1041.28205 | -0.01321 | 0.00025 | 169.09305 | -458.98263 | 15.96082 | 64.69393 |
| 9-11  | -1041.77880 | -1041.29644 | -1041.76429 | -1041.28193 | -0.01320 | 0.00019 | 168.96336 | -459.11188 | 15.95427 | 64.69393 |
| 9-12  | -1041.77817 | -1041.29623 | -1041.76382 | -1041.28188 | -0.01319 | 0.00121 | 168.47682 | -456.82137 | 15.98732 | 64.69393 |
| 9-14  | -1041.77819 | -1041.29602 | -1041.76382 | -1041.28165 | -0.01317 | 0.00019 | 168.47366 | -458.66127 | 15.95572 | 64.69393 |
| 9-17  | -1041.77783 | -1041.29565 | -1041.76369 | -1041.28151 | -0.01315 | 0.00045 | 168.33714 | -457.63131 | 15.94091 | 64.69393 |
| 9-21  | -1041.77764 | -1041.29584 | -1041.76329 | -1041.28149 | -0.01315 | 0.00232 | 167.90990 | -455.59295 | 15.97839 | 64.69393 |
| 9-24  | -1041.77765 | -1041.29547 | -1041.76326 | -1041.28108 | -0.01310 | 0.00014 | 167.88127 | -458.34350 | 15.92190 | 64.69393 |
| 9-31  | -1041.77728 | -1041.29524 | -1041.76310 | -1041.28105 | -0.01310 | 0.00030 | 167.71245 | -457.46026 | 15.98170 | 64.69393 |
| 9-33  | -1041.77732 | -1041.29526 | -1041.76298 | -1041.28093 | -0.01309 | 0.00040 | 167.59195 | -457.07595 | 16.01761 | 64.69393 |
| 9-36  | -1041.77707 | -1041.29518 | -1041.76285 | -1041.28096 | -0.01309 | 0.00056 | 167.45036 | -456.55423 | 15.97883 | 64.69393 |
| 9-50  | -1041.77674 | -1041.29423 | -1041.76254 | -1041.28003 | -0.01299 | 0.00019 | 167.12871 | -457.33983 | 16.02274 | 64.69393 |
| 9-55  | -1041.77671 | -1041.29466 | -1041.76245 | -1041.28041 | -0.01303 | 0.00019 | 167.03524 | -457.27749 | 16.02987 | 64.69393 |
| 9-56  | -1041.77680 | -1041.29483 | -1041.76245 | -1041.28047 | -0.01304 | 0.00208 | 167.02917 | -454.93443 | 16.08947 | 64.69393 |
| 9-61  | -1041.77669 | -1041.29463 | -1041.76237 | -1041.28031 | -0.01302 | 0.00025 | 166.94955 | -456.90948 | 16.03566 | 64.69393 |
| 9-64  | -1041.77668 | -1041.29488 | -1041.76231 | -1041.28051 | -0.01304 | 0.00062 | 166.88122 | -455.95570 | 16.04575 | 64.69393 |
| 9-65  | -1041.77626 | -1041.29455 | -1041.76225 | -1041.28054 | -0.01304 | 0.00114 | 166.81819 | -455.33419 | 16.10309 | 64.69393 |
| 9-67  | -1041.77631 | -1041.29466 | -1041.76224 | -1041.28058 | -0.01305 | 0.00149 | 166.80430 | -455.01557 | 16.06577 | 64.69393 |
| 9-77  | -1041.77619 | -1041.29446 | -1041.76208 | -1041.28035 | -0.01302 | 0.00220 | 166.64319 | -454.50980 | 16.10927 | 64.69393 |
| 9-81  | -1041.77632 | -1041.29429 | -1041.76205 | -1041.28002 | -0.01298 | 0.00018 | 166.61082 | -456.93726 | 16.05880 | 64.69393 |
| 9-95  | -1041.77574 | -1041.29438 | -1041.76184 | -1041.28048 | -0.01304 | 0.00509 | 166.39098 | -453.49040 | 16.17880 | 64.69393 |
| 9-119 | -1041.77534 | -1041.29400 | -1041.76146 | -1041.28011 | -0.01300 | 0.00172 | 165.98430 | -454.06657 | 16.07743 | 64.69393 |
| 9-146 | -1041.77508 | -1041.29329 | -1041.76103 | -1041.27924 | -0.01290 | 0.00070 | 165.53366 | -454.57665 | 16.13727 | 64.69393 |
| 9-157 | -1041.77495 | -1041.29332 | -1041.76089 | -1041.27926 | -0.01290 | 0.00017 | 165.38639 | -455.69803 | 15.97341 | 64.69393 |
| 9-163 | -1041.77487 | -1041.29286 | -1041.76081 | -1041.27879 | -0.01285 | 0.00015 | 165.30485 | -455.80548 | 16.07393 | 64.69393 |
| 9-165 | -1041.77486 | -1041.29331 | -1041.76080 | -1041.27925 | -0.01290 | 0.00072 | 165.29117 | -454.14512 | 15.97144 | 64.69393 |
| 9-297 | -1041.77297 | -1041.29132 | -1041.75926 | -1041.27760 | -0.01272 | 0.00029 | 163.66891 | -453.55186 | 16.10492 | 64.69393 |
| 10-1  | -1157.53590 | -1156.99965 | -1157.51929 | -1156.98303 | -0.01351 | 0.00027 | 191.32911 | -509.86038 | 16.23042 | 64.85197 |
| 10-6  | -1157.53462 | -1156.99857 | -1157.51816 | -1156.98212 | -0.01342 | 0.00012 | 190.14510 | -509.44671 | 16.24364 | 64.85197 |
| 10-8  | -1157.53454 | -1156.99808 | -1157.51807 | -1156.98161 | -0.01337 | 0.00016 | 190.04839 | -509.08993 | 16.24699 | 64.85197 |
| 10-10 | -1157.53442 | -1156.99853 | -1157.51797 | -1156.98209 | -0.01341 | 0.00051 | 189.94892 | -507.84940 | 16.25304 | 64.85197 |
| 10-13 | -1157.53433 | -1156.99837 | -1157.51788 | -1156.98193 | -0.01340 | 0.00015 | 189.85400 | -508.97613 | 16.22179 | 64.85197 |
| 10-15 | -1157.53419 | -1156.99845 | -1157.51785 | -1156.98210 | -0.01342 | 0.00045 | 189.81317 | -507.84345 | 16.25490 | 64.85197 |
| 10-16 | -1157.53386 | -1156.99798 | -1157.51776 | -1156.98188 | -0.01339 | 0.00040 | 189.72010 | -507.90739 | 16.29848 | 64.85197 |
| 10-21 | -1157.53371 | -1156.99796 | -1157.51749 | -1156.98174 | -0.01338 | 0.00056 | 189.43470 | -507.20391 | 16.21062 | 64.85197 |
| 10-25 | -1157.53372 | -1156.99807 | -1157.51743 | -1156.98178 | -0.01338 | 0.00058 | 189.37746 | -507.15911 | 16.25824 | 64.85197 |
| 10-27 | -1157.53365 | -1156.99790 | -1157.51741 | -1156.98165 | -0.01337 | 0.00030 | 189.35508 | -507.80831 | 16.27102 | 64.85197 |
| 10-33 | -1157.53342 | -1156.99777 | -1157.51725 | -1156.98160 | -0.01337 | 0.00092 | 189.18736 | -506.59323 | 16.34553 | 64.85197 |
| 10-40 | -1157.53318 | -1156.99794 | -1157.51703 | -1156.98179 | -0.01338 | 0.00110 | 188.95151 | -505.41368 | 15.58748 | 64.85197 |
| 10-50 | -1157.53291 | -1156.99714 | -1157.51675 | -1156.98098 | -0.01330 | 0.00038 | 188.66408 | -506.83806 | 16.24383 | 64.85197 |

|        |             |             |             |             |          |         |           |            |          |          |
|--------|-------------|-------------|-------------|-------------|----------|---------|-----------|------------|----------|----------|
| 10-53  | -1157.53282 | -1156.99715 | -1157.51670 | -1156.98104 | -0.01331 | 0.00065 | 188.60982 | -506.33257 | 16.32317 | 64.85197 |
| 10-74  | -1157.53234 | -1156.99622 | -1157.51621 | -1156.98009 | -0.01321 | 0.00019 | 188.09553 | -507.01753 | 16.29820 | 64.85197 |
| 10-85  | -1157.53205 | -1156.99673 | -1157.51600 | -1156.98069 | -0.01327 | 0.00014 | 187.87353 | -507.08674 | 16.24839 | 64.85197 |
| 10-94  | -1157.53174 | -1156.99616 | -1157.51578 | -1156.98020 | -0.01322 | 0.00039 | 187.64318 | -506.02905 | 16.46379 | 64.85197 |
| 10-135 | -1157.53156 | -1156.99611 | -1157.51539 | -1156.97994 | -0.01320 | 0.00117 | 187.23231 | -504.45080 | 16.40017 | 64.85197 |
| 10-141 | -1157.53099 | -1156.99547 | -1157.51532 | -1156.97979 | -0.01318 | 0.00012 | 187.14981 | -506.53923 | 16.27521 | 64.85197 |
| 10-148 | -1157.53118 | -1156.99609 | -1157.51526 | -1156.98017 | -0.01322 | 0.00024 | 187.09115 | -505.05928 | 15.58345 | 64.85197 |
| 10-155 | -1157.53118 | -1156.99558 | -1157.51521 | -1156.97962 | -0.01317 | 0.00013 | 187.03969 | -506.40771 | 16.37958 | 64.85197 |
| 10-157 | -1157.53123 | -1156.99554 | -1157.51519 | -1156.97949 | -0.01315 | 0.00020 | 187.01861 | -506.05243 | 16.45638 | 64.85197 |
| 10-172 | -1157.53098 | -1156.99564 | -1157.51505 | -1156.97972 | -0.01318 | 0.00043 | 186.87527 | -505.07055 | 16.38297 | 64.85197 |
| 10-190 | -1157.53086 | -1156.99546 | -1157.51491 | -1156.97951 | -0.01316 | 0.00050 | 186.72496 | -504.84853 | 16.46609 | 64.85197 |
| 10-211 | -1157.53061 | -1156.99592 | -1157.51472 | -1156.98002 | -0.01321 | 0.00234 | 186.52169 | -502.23313 | 15.58629 | 64.85197 |
| 10-226 | -1157.53052 | -1156.99497 | -1157.51454 | -1156.97899 | -0.01310 | 0.00050 | 186.33010 | -504.39739 | 16.39889 | 64.85197 |
| 10-236 | -1157.53024 | -1156.99457 | -1157.51447 | -1156.97880 | -0.01309 | 0.00019 | 186.25983 | -505.26002 | 16.37396 | 64.85197 |
| 10-381 | -1157.52905 | -1156.99359 | -1157.51319 | -1156.97773 | -0.01298 | 0.00016 | 184.91457 | -504.25643 | 16.54080 | 64.85197 |
| 10-469 | -1157.52781 | -1156.99238 | -1157.51249 | -1156.97705 | -0.01291 | 0.00046 | 184.17226 | -502.56713 | 16.65017 | 64.85197 |
| 10-494 | -1157.52770 | -1156.99229 | -1157.51224 | -1156.97683 | -0.01289 | 0.00013 | 183.90807 | -503.49676 | 16.53672 | 64.85197 |
| 10-582 | -1157.52655 | -1156.99104 | -1157.51133 | -1156.97583 | -0.01279 | 0.00011 | 182.95743 | -502.81522 | 16.71341 | 64.85197 |
| 11-11  | -1273.28980 | -1272.70000 | -1273.27167 | -1272.68187 | -0.01356 | 0.00017 | 210.94454 | -558.57715 | 16.47085 | 64.99493 |
| 11-21  | -1273.28937 | -1272.69972 | -1273.27117 | -1272.68152 | -0.01353 | 0.00012 | 210.41392 | -558.43065 | 16.48692 | 64.99493 |
| 11-40  | -1273.28849 | -1272.69870 | -1273.27068 | -1272.68090 | -0.01347 | 0.00017 | 209.90425 | -557.60719 | 16.56930 | 64.99493 |
| 11-45  | -1273.28863 | -1272.69946 | -1273.27065 | -1272.68147 | -0.01352 | 0.00056 | 209.86281 | -556.36759 | 16.54800 | 64.99493 |
| 11-52  | -1273.28841 | -1272.69888 | -1273.27048 | -1272.68094 | -0.01347 | 0.00013 | 209.68924 | -557.58341 | 16.51281 | 64.99493 |
| 11-79  | -1273.28770 | -1272.69812 | -1273.26995 | -1272.68038 | -0.01342 | 0.00018 | 209.13553 | -556.79659 | 16.55120 | 64.99493 |
| 11-86  | -1273.28792 | -1272.69858 | -1273.26990 | -1272.68056 | -0.01344 | 0.00095 | 209.08174 | -555.12496 | 16.61211 | 64.99493 |
| 11-141 | -1273.28732 | -1272.69787 | -1273.26939 | -1272.67994 | -0.01338 | 0.00017 | 208.54652 | -556.28183 | 16.60991 | 64.99493 |
| 11-148 | -1273.28675 | -1272.69768 | -1273.26923 | -1272.68016 | -0.01340 | 0.00210 | 208.36970 | -553.72792 | 16.72402 | 64.99493 |
| 11-174 | -1273.28680 | -1272.69744 | -1273.26900 | -1272.67965 | -0.01335 | 0.00016 | 208.13004 | -555.91056 | 16.58765 | 64.99493 |
| 11-223 | -1273.28610 | -1272.69720 | -1273.26857 | -1272.67967 | -0.01336 | 0.00347 | 207.68160 | -552.54631 | 16.73564 | 64.99493 |
| 11-233 | -1273.28650 | -1272.69731 | -1273.26847 | -1272.67929 | -0.01332 | 0.00018 | 207.57749 | -555.22843 | 16.56669 | 64.99493 |
| 11-309 | -1273.28554 | -1272.69644 | -1273.26806 | -1272.67896 | -0.01329 | 0.00061 | 207.14588 | -553.82790 | 16.81719 | 64.99493 |
| 11-345 | -1273.28531 | -1272.69615 | -1273.26775 | -1272.67859 | -0.01326 | 0.00042 | 206.81113 | -553.86148 | 16.79620 | 64.99493 |
| 12-20  | -1389.04575 | -1388.40222 | -1389.02562 | -1388.38209 | -0.01371 | 0.00016 | 232.20628 | -608.52411 | 16.69744 | 65.12545 |
| 12-23  | -1389.04538 | -1388.40226 | -1389.02540 | -1388.38228 | -0.01373 | 0.00056 | 231.97058 | -607.05688 | 16.75690 | 65.12545 |
| 12-108 | -1389.04373 | -1388.40081 | -1389.02390 | -1388.38098 | -0.01362 | 0.00036 | 230.38700 | -605.98032 | 16.82316 | 65.12545 |
| 12-111 | -1389.04366 | -1388.40055 | -1389.02385 | -1388.38075 | -0.01360 | 0.00014 | 230.34355 | -606.86223 | 16.80811 | 65.12545 |
| 12-171 | -1389.04286 | -1388.39965 | -1389.02329 | -1388.38008 | -0.01355 | 0.00013 | 229.75140 | -606.38803 | 16.83997 | 65.12545 |
| 13-7   | -1504.80361 | -1504.10610 | -1504.78111 | -1504.08361 | -0.01394 | 0.00011 | 255.08718 | -660.28890 | 16.84566 | 65.24551 |
| 13-109 | -1504.79993 | -1504.10277 | -1504.77772 | -1504.08056 | -0.01371 | 0.00014 | 251.51786 | -656.45469 | 16.86459 | 65.24551 |
| 14-26  | -1620.55818 | -1619.80690 | -1620.53432 | -1619.78304 | -0.01399 | 0.00026 | 275.56283 | -708.43098 | 17.05970 | 65.35668 |
| 14-34  | -1620.55810 | -1619.80757 | -1620.53389 | -1619.78336 | -0.01402 | 0.00054 | 275.11512 | -707.28715 | 17.09302 | 65.35668 |



**Table S3** The local minima of the cluster size  $n=1-13$  sorted by the electronic energies ( $E_0$ ) in Hartree at MP2/6-31+G(d,p). The cluster probabilities and the natural logarithms of the four cluster partition functions were computed at 300 K. Those with a probability lower than 0.0001 were not shown. The cluster indices ( $n-i$ ) cannot be cross-referenced in the other tables. The coordinate files are available on our PyQCE website.<sup>1</sup>

| $n-i$ | $E_0$       | $E_0+E_{zpe}$ | $E_{bind}$ | $P(300K)$ | $\ln q_{i,elec}$ | $\ln q_{i,vib}$ | $\ln q_{i,rot}$ | $\ln q_{i,trans}$ |
|-------|-------------|---------------|------------|-----------|------------------|-----------------|-----------------|-------------------|
| 4-1   | -461.63091  | -461.41156    | -0.01203   | 0.00137   | 65.17557         | -213.02662      | 13.10492        | 63.89809          |
| 4-2   | -461.62918  | -461.41004    | -0.01165   | 0.00124   | 63.35804         | -211.99951      | 13.79324        | 63.89809          |
| 5-1   | -577.04327  | -576.76914    | -0.01297   | 0.04720   | 86.34948         | -261.98371      | 14.47388        | 64.23280          |
| 6-1   | -692.45497  | -692.12559    | -0.01341   | 0.00261   | 106.82661        | -315.57385      | 14.83917        | 64.50629          |
| 6-2   | -692.45483  | -692.12604    | -0.01348   | 0.14748   | 106.67546        | -310.52675      | 13.97795        | 64.50629          |
| 6-3   | -692.45471  | -692.12540    | -0.01338   | 0.00273   | 106.54852        | -315.28674      | 14.87394        | 64.50629          |
| 6-4   | -692.45432  | -692.12534    | -0.01337   | 0.01174   | 106.13623        | -313.41394      | 14.87391        | 64.50629          |
| 7-1   | -807.86676  | -807.48246    | -0.01378   | 0.00459   | 127.39375        | -365.80873      | 15.28974        | 64.73751          |
| 7-2   | -807.86598  | -807.48174    | -0.01368   | 0.00218   | 126.57848        | -365.75374      | 15.30442        | 64.73751          |
| 7-3   | -807.86591  | -807.48184    | -0.01369   | 0.01381   | 126.50622        | -363.85515      | 15.32521        | 64.73751          |
| 7-4   | -807.86591  | -807.48184    | -0.01369   | 0.01794   | 126.50620        | -363.59378      | 15.32561        | 64.73751          |
| 7-5   | -807.86548  | -807.48162    | -0.01366   | 0.01257   | 126.04643        | -363.56219      | 15.39784        | 64.73751          |
| 7-6   | -807.86530  | -807.48163    | -0.01366   | 0.07241   | 125.85660        | -361.59122      | 15.36803        | 64.73751          |
| 7-7   | -807.86364  | -807.47988    | -0.01341   | 0.00030   | 124.11747        | -365.31028      | 15.32451        | 64.73751          |
| 7-8   | -807.86172  | -807.47828    | -0.01318   | 0.00334   | 122.09447        | -361.04888      | 15.51096        | 64.73751          |
| 8-1   | -923.28056  | -922.84101    | -0.01427   | 0.00295   | 150.08401        | -418.33620      | 14.95333        | 64.93781          |
| 8-2   | -923.27857  | -922.83879    | -0.01399   | 0.00015   | 147.98668        | -419.92009      | 15.65103        | 64.93781          |
| 8-3   | -923.27663  | -922.83729    | -0.01380   | 0.00019   | 145.94669        | -417.76366      | 15.79139        | 64.93781          |
| 8-4   | -923.27653  | -922.83781    | -0.01387   | 0.01734   | 145.84384        | -413.15866      | 15.78866        | 64.93781          |
| 8-5   | -923.27642  | -922.83777    | -0.01386   | 0.00571   | 145.73041        | -414.11028      | 15.74266        | 64.93781          |
| 8-6   | -923.27336  | -922.83489    | -0.01350   | 0.00046   | 142.50022        | -413.46182      | 15.80933        | 64.93781          |
| 8-7   | -923.27330  | -922.83547    | -0.01358   | 0.50017   | 142.44366        | -405.32286      | 14.71500        | 64.93781          |
| 9-2   | -1038.69110 | -1038.19681   | -0.01434   | 0.00256   | 169.33729        | -468.45315      | 15.98657        | 65.11448          |
| 9-3   | -1038.68807 | -1038.19419   | -0.01405   | 0.00111   | 166.14735        | -466.20419      | 16.09388        | 65.11448          |
| 9-4   | -1038.68771 | -1038.19413   | -0.01405   | 0.08650   | 165.77017        | -461.59576      | 16.21564        | 65.11448          |
| 9-5   | -1038.68758 | -1038.19392   | -0.01402   | 0.00071   | 165.63222        | -466.05920      | 16.00769        | 65.11448          |
| 10-2  | -1154.10390 | -1153.55456   | -0.01460   | 0.00044   | 190.97013        | -521.74161      | 16.22007        | 65.27252          |
| 10-3  | -1154.10335 | -1153.55379   | -0.01452   | 0.00030   | 190.38891        | -521.59293      | 16.26542        | 65.27252          |
| 10-4  | -1154.10198 | -1153.55335   | -0.01448   | 0.00639   | 188.94794        | -516.41738      | 15.59448        | 65.27252          |
| 10-5  | -1154.10137 | -1153.55206   | -0.01435   | 0.00039   | 188.31046        | -519.31516      | 16.33536        | 65.27252          |
| 10-6  | -1154.10121 | -1153.55205   | -0.01435   | 0.00027   | 188.13532        | -519.51884      | 16.32951        | 65.27252          |
| 10-7  | -1154.09902 | -1153.55052   | -0.01420   | 0.02380   | 185.83523        | -512.00391      | 15.60851        | 65.27252          |
| 10-8  | -1154.09533 | -1153.54604   | -0.01375   | 0.00016   | 181.95415        | -514.22145      | 16.71888        | 65.27252          |
| 11-2  | -1269.51581 | -1268.91091   | -0.01468   | 0.00014   | 211.67415        | -573.54813      | 16.52762        | 65.41549          |

|      |             |             |          |         |           |            |          |          |
|------|-------------|-------------|----------|---------|-----------|------------|----------|----------|
| 11-3 | -1269.51502 | -1268.91057 | -0.01465 | 0.00012 | 210.83783 | -572.88997 | 16.55478 | 65.41549 |
| 12-1 | -1384.92735 | -1384.26833 | -0.01484 | 0.00013 | 231.97810 | -623.79990 | 16.76402 | 65.54601 |
| 12-2 | -1384.92690 | -1384.26803 | -0.01481 | 0.00060 | 231.50079 | -621.77149 | 16.78409 | 65.54601 |
| 12-3 | -1384.92411 | -1384.26507 | -0.01457 | 0.00034 | 228.57043 | -619.54753 | 16.92890 | 65.54601 |
| 12-4 | -1384.92271 | -1384.26436 | -0.01451 | 0.00072 | 227.08921 | -617.29113 | 16.88846 | 65.54601 |
| 13-1 | -1500.34241 | -1499.62809 | -0.01515 | 0.00443 | 255.99107 | -673.95140 | 16.87308 | 65.66607 |
| 13-4 | -1500.33714 | -1499.62275 | -0.01474 | 0.00011 | 250.44532 | -672.35261 | 17.11335 | 65.66607 |
| 13-5 | -1500.33203 | -1499.61814 | -0.01438 | 0.00169 | 245.06570 | -664.49976 | 17.38482 | 65.66607 |

**Table S4** The local minima of the cluster size  $n=1-9$  sorted by counterpoise corrected energies ( $E_0+E_{cp}$ ) in Hartree using MP2/6-311++G(d,p) single-point calculations level of theory. The  $E_{zpe}$  was obtained from the frequency calculations of MP2/6-31+G(d, p). The optimized structures were taken from **Table S3**. The cluster probabilities and the natural logarithms of the four cluster partition functions were computed at 300 K. Those with a probability lower than 0.0001 were not shown (e.g.,  $n > 9$ ). The cluster indices ( $n-i$ ) correspond to those in **Table 2** and cannot be cross-referenced in **Table S1 – S3** and **S5**. The coordinate files are available on our PyQCE website.<sup>1</sup>

| $n-i$        | $E_0$       | $E_0+E_{zpe}$ | $E_0+E_{cp}$ | $E_0+E_{cp}+E_{zpe}$ | $E_{bind}$ | $P(300K)$ | $\ln q_{i,elec}$ | $\ln q_{i,vib}$ | $\ln q_{i,rot}$ | $\ln q_{i,trans}$ |
|--------------|-------------|---------------|--------------|----------------------|------------|-----------|------------------|-----------------|-----------------|-------------------|
| 1-1 (1-I)    | -115.44509  | -115.39243    | -115.44509   | -115.39243           | 0.00000    | 0.00268   | 5.85370          | -55.17512       | 8.07103         | 60.32768          |
| 2-1 (2-I)    | -230.90102  | -230.79338    | -230.89791   | -230.79026           | -0.00271   | 0.00044   | 19.84389         | -105.82238      | 11.45460        | 61.36740          |
| 3-1 (3-I)    | -346.36540  | -346.20172    | -346.35834   | -346.19466           | -0.00579   | 0.00038   | 41.84628         | -160.25264      | 13.00939        | 61.97560          |
| 3-2 (3-II)   | -346.36406  | -346.20075    | -346.35716   | -346.19385           | -0.00552   | 0.00076   | 40.60175         | -157.21033      | 11.90907        | 61.97560          |
| 4-1 (4-I)    | -461.83465  | -461.61530    | -461.82058   | -461.60122           | -0.00788   | 0.00201   | 65.74551         | -213.02662      | 13.10492        | 62.40712          |
| 4-2 (4-II)   | -461.83304  | -461.61390    | -461.81935   | -461.60021           | -0.00763   | 0.00306   | 64.45119         | -211.99951      | 13.79324        | 62.40712          |
| 5-1 (5-I)    | -577.29851  | -577.02438    | -577.27887   | -577.00474           | -0.00852   | 0.02314   | 85.49504         | -261.98371      | 14.47388        | 62.74184          |
| 6-1 (6-I)    | -692.76159  | -692.43280    | -692.73729   | -692.40850           | -0.00899   | 0.06450   | 105.37906        | -310.52675      | 13.97795        | 63.01532          |
| 6-2 (6-II)   | -692.76094  | -692.43196    | -692.73558   | -692.40660           | -0.00867   | 0.00145   | 103.57834        | -313.41394      | 14.87391        | 63.01532          |
| 6-3 (6-III)  | -692.76119  | -692.43188    | -692.73549   | -692.40618           | -0.00860   | 0.00020   | 103.48522        | -315.28674      | 14.87394        | 63.01532          |
| 6-4 (6-IV)   | -692.76132  | -692.43193    | -692.73544   | -692.40606           | -0.00858   | 0.00014   | 103.43790        | -315.57385      | 14.83917        | 63.01532          |
| 7-1 (7-I)    | -808.22331  | -807.83964    | -808.19320   | -807.80953           | -0.00893   | 0.00633   | 122.62207        | -361.59122      | 15.36803        | 63.24655          |
| 7-2 (7-II)   | -808.22346  | -807.83938    | -808.19314   | -807.80907           | -0.00887   | 0.00077   | 122.56415        | -363.59378      | 15.32561        | 63.24655          |
| 7-4 (7-IV)   | -808.22345  | -807.83937    | -808.19313   | -807.80906           | -0.00887   | 0.00059   | 122.55751        | -363.85515      | 15.32521        | 63.24655          |
| 7-5 (7-V)    | -808.22363  | -807.83977    | -808.19267   | -807.80881           | -0.00883   | 0.00052   | 122.06858        | -363.56219      | 15.39784        | 63.24655          |
| 7-8 (7-VIII) | -808.21949  | -807.83604    | -808.19089   | -807.80745           | -0.00864   | 0.00111   | 120.19583        | -361.04888      | 15.51096        | 63.24655          |
| 8-1 (8-I)    | -923.68926  | -923.24971    | -923.65185   | -923.21230           | -0.00911   | 0.00001   | 142.75280        | -418.33620      | 14.95333        | 63.44685          |
| 8-2 (8-II)   | -923.68285  | -923.24502    | -923.65103   | -923.21320           | -0.00922   | 0.88913   | 141.89406        | -405.32286      | 14.71500        | 63.44685          |
| 8-4 (8-IV)   | -923.68601  | -923.24735    | -923.64963   | -923.21098           | -0.00895   | 0.00009   | 140.42149        | -414.11028      | 15.74266        | 63.44685          |
| 8-5 (8-V)    | -923.68593  | -923.24721    | -923.64958   | -923.21085           | -0.00893   | 0.00022   | 140.35883        | -413.15866      | 15.78866        | 63.44685          |
| 9-2 (9-II)   | -1039.14822 | -1038.65464   | -1039.10781  | -1038.614227         | -0.00915   | 0.00121   | 160.04808        | -461.59576      | 16.21564        | 63.62352          |

**Table S5** The local minima of the cluster size  $n=1-9$  sorted by the electronic energies at MP2/6-31+G(d,p). The cluster probabilities and the natural logarithms of the four cluster partition functions were computed at 340 K. High probability clusters were marked by \*, which were mainly contributed by electronic and vibrational partition functions. Those with a probability lower than 0.0001 were not shown.

| $n-i$ | $P(340\text{ K})$ | $\ln q_{i,elec}$ | $\ln q_{i,vib}$ | $\ln q_{i,rot}$ | $\ln q_{i,trans}$ |
|-------|-------------------|------------------|-----------------|-----------------|-------------------|
| 1-1*  | 0.40083           | 1.18256          | -48.58148       | 8.25878         | 62.00639          |
| 2-1   | 0.01034           | 12.83757         | -91.78983       | 11.64234        | 63.04611          |
| 3-1   | 0.00323           | 33.28117         | -138.74499      | 13.19716        | 63.65431          |
| 3-2   | 0.00321           | 33.28112         | -138.75140      | 13.19670        | 63.65431          |
| 3-3   | 0.00321           | 33.28098         | -138.75053      | 13.19714        | 63.65431          |
| 3-4   | 0.00518           | 31.83661         | -135.72787      | 12.09681        | 63.65431          |
| 3-5   | 0.00033           | 28.89629         | -136.64184      | 13.20800        | 63.65431          |
| 4-1   | 0.03913           | 57.50786         | -184.07133      | 13.29267        | 64.08583          |
| 4-2   | 0.04306           | 55.90416         | -183.06017      | 13.98098        | 64.08583          |
| 5-1*  | 0.24583           | 76.19072         | -225.62260      | 14.66162        | 64.42055          |
| 5-3   | 0.00014           | 71.94166         | -228.67316      | 14.50418        | 64.42055          |
| 5-5   | 0.00046           | 71.42903         | -227.05888      | 14.56907        | 64.42055          |
| 5-6   | 0.00051           | 71.05300         | -226.57265      | 14.56834        | 64.42055          |
| 5-8   | 0.00013           | 68.74383         | -225.63216      | 14.55341        | 64.42055          |
| 6-1   | 0.00271           | 94.25877         | -271.79798      | 15.02691        | 64.69403          |
| 6-2*  | 0.15502           | 94.12541         | -266.75767      | 14.16569        | 64.69403          |
| 6-3   | 0.00292           | 94.01340         | -271.51450      | 15.06169        | 64.69403          |
| 6-4   | 0.01307           | 93.64961         | -269.65145      | 15.06166        | 64.69403          |
| 7-1   | 0.00094           | 112.40625        | -314.61871      | 15.47749        | 64.92526          |
| 7-2   | 0.00049           | 111.68689        | -314.56590      | 15.49216        | 64.92526          |
| 7-3   | 0.00312           | 111.62313        | -312.67397      | 15.51296        | 64.92526          |
| 7-4   | 0.00405           | 111.62311        | -312.41242      | 15.51335        | 64.92526          |
| 7-5   | 0.00296           | 111.21744        | -312.39323      | 15.58559        | 64.92526          |
| 7-6   | 0.01746           | 111.04994        | -310.42046      | 15.55578        | 64.92526          |
| 7-8   | 0.00124           | 107.73042        | -309.88788      | 15.69871        | 64.92526          |
| 8-4   | 0.00088           | 128.68574        | -354.57760      | 15.97640        | 65.12555          |
| 8-5   | 0.00029           | 128.58565        | -355.53972      | 15.93041        | 65.12555          |
| 8-7   | 0.03759           | 125.68558        | -346.74974      | 14.90274        | 65.12555          |
| 9-4   | 0.00094           | 146.26779        | -395.59464      | 16.40338        | 65.30223          |

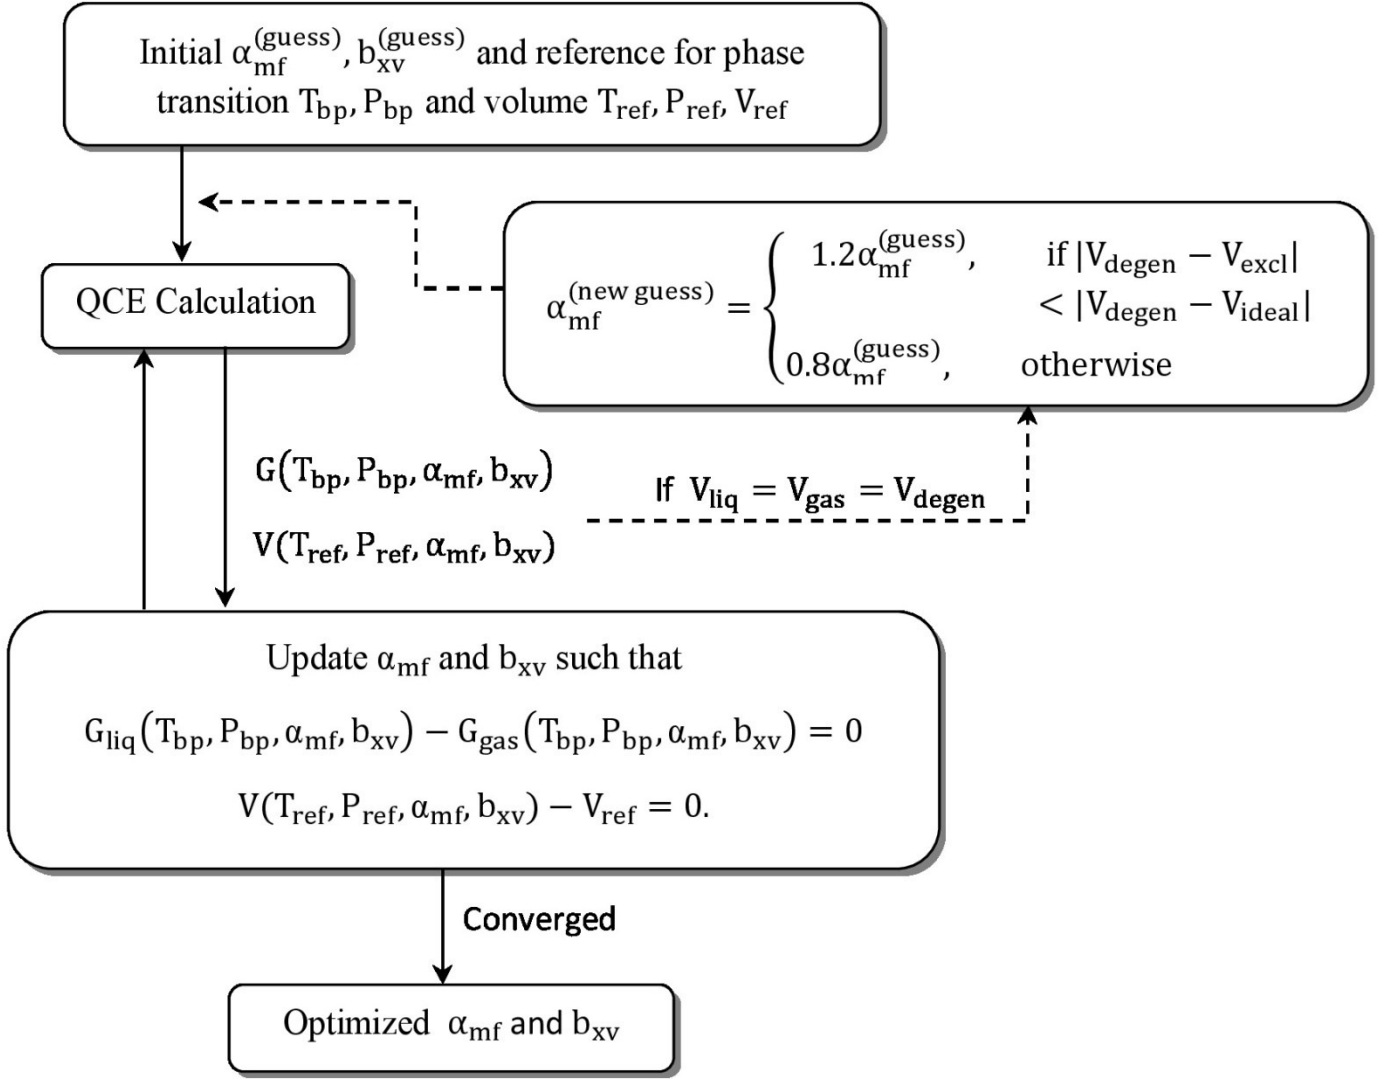

**Figure S1** Parameter optimization implemented in PyQCE. For a pair of initial  $\alpha_{mf}^{(guess)}$  and  $b_{xv}^{(guess)}$ , two QCE calculation (readers can refer to the multi-component systems section in Weinhold’s original work for the setup<sup>2</sup>) was performed. One at the boiling point  $(T_{bp}, P_{bp})$  to determine the Gibbs free energy for the gas ( $G_{gas}$ ) and the liquid phase ( $G_{liq}$ ), another at a referenced condition  $(T_{ref}, P_{ref})$  to obtain the volume  $V \in \{V_{gas}, V_{liq}\}$  with respect to the referenced phase. The algorithm then checked whether the volume is degenerate and restarted the iteration with a new guess for the parameters if so (see the “**Parameter optimization in PyQCE**” section below). The optimizing cycle repeats until the parameters converge. The convergence criterion is 1E-5 for the population  $\{N_i\}$ , the Gibbs free energy  $G$  and the volume  $V$ . For parameter fitting, we set a strict constraint of 1E-10 for the convergence of  $\alpha_{mf}$  and  $b_{xv}$ . Here, the convergence criterion for a property  $x$  is defined as  $|x_k - x_{k+1}|/x_{k+1}$  in which the index  $k$  refers to the number of iteration.

# MP2-CP

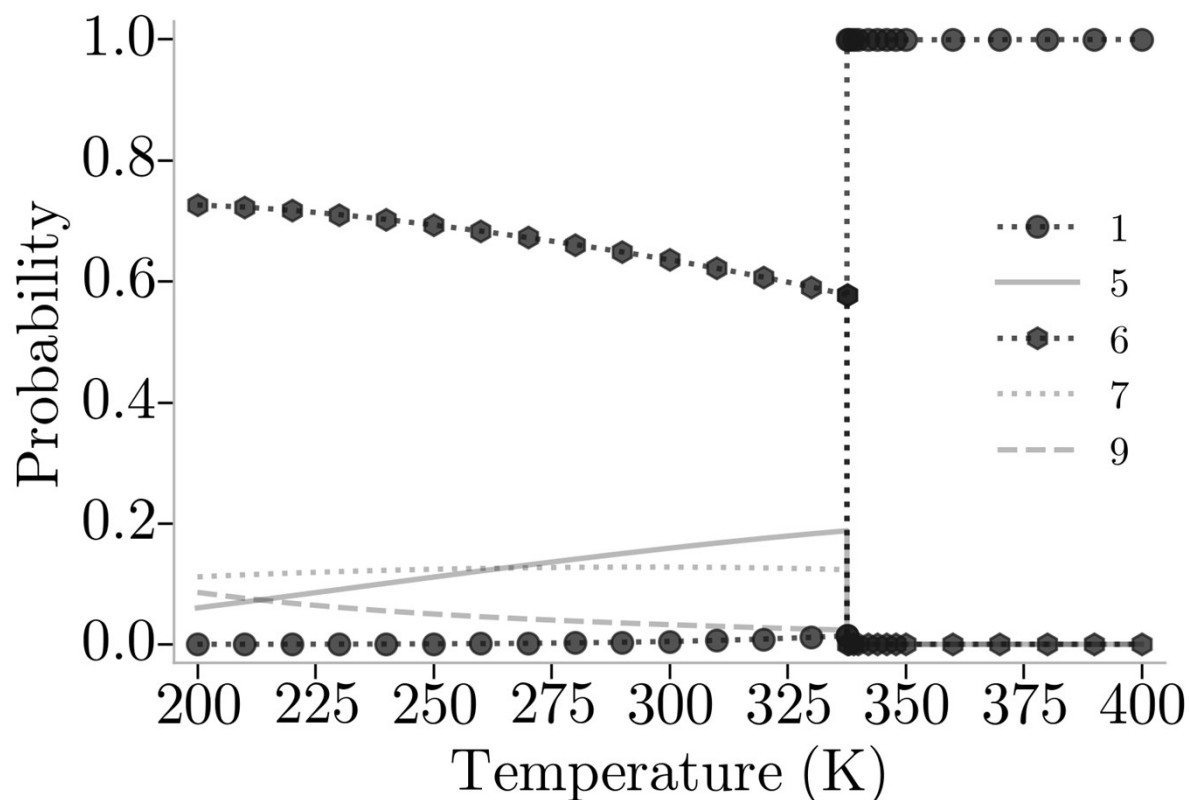

**Figure S2** Temperature-dependent cluster probabilities at MP2-CP/6-311++G(d,p). Here, we manually removed the **8-II** structures in **Table 2** and plotted the cluster sizes with the maximal probability greater than 0.1. Without **8-II**, the cluster probability of the QCE model shows that cyclic hexamer (**6-I**) contributes more than 60% to the overall probability. The plot is nearly identical to the cluster probability done by Matisz, Kunsági-Máté, *et al.* [see **Fig. 3** in *Ref. 4* (constant  $\alpha_{mf}$  and  $b_{xv}$ )].

# Parameter optimization in PyQCE<sup>1</sup>

Eq. 15 implies a trivial minimum solution  $V_{liquid} = V_{gas} = V_{deg}$  (*deg* stands for degenerate) that is unphysical. Such degeneracy is related to the parameters  $\alpha_{mf}$  via the volume polynomial in Eq. 13. From Descartes' rule of sign, the polynomial can have either three positive real roots or one positive real root with two imaginary roots, and the degenerate case refers to the latter. At two limits of  $\alpha_{mf}$ , only a single real positive degenerate root is obtained: (i)  $\alpha_{mf} \ll 1$ ,  $V_{deg} = k_B T \sum_i N_i / P + V_{excl} \approx V_{ideal}$  where  $V_{ideal}$  is the ideal gas volume at a given  $T$  and  $P$ ; (ii)  $1/(\alpha_{mf} N_A) \ll 1$ ,  $V_{deg} = V_{excl}$ . These limits of  $\alpha_{mf}$  represent a bounded region in which the solutions are nondegenerate. The degeneracies are problematic for optimization as they solve Eq. 15 exactly but not Eq. 16, leading to further minimization iteration remained stuck in the vicinity of the local minima.

Therefore, during the optimization of parameters, once the degeneracy occurs (i.e.,  $V_{liquid} = V_{gas} = V_{deg}$ ), we restart the minimization with a new guess of  $\alpha_{mf}$  determined by

$$\alpha_{mf}^{(new\ guess)} = \begin{cases} 1.2\alpha_{mf}^{(guess)} & , \text{ if } |V_{deg} - V_{excl}| < |V_{deg} - V_{ideal}| \\ 0.8\alpha_{mf}^{(guess)} & , \text{ otherwise} \end{cases} \quad (1)$$

The value of  $b_{xv}^{(guess)}$  at each new iteration are chosen to be 1 due to its weak effect on condensed-phase cluster populations.<sup>2</sup> This modification attempts to lift the degeneracy by scaling the parameter  $\alpha_{mf}$  in the opposite direction of the aforementioned limits. The minimization procedure uses the Powell's hybrid method.<sup>3</sup>

To compare with Fig. 3 in Ref. 4, we adopted *model 1* (constant  $\alpha_{mf}$  and  $b_{xv}$ ) proposed by Matisz, Kunsági-Máté, *et al.*, which assumed both parameters are independent with temperature and pressure. The different values of  $\alpha_{mf}$  for the four datasets represent the amount of correction needed in the intermolecular interaction to fit the experimental data.

## References

1. Teh Soon and Po-Jen Hsu. PyQCE, [http://140.109.113.226:30000/gristlegrime/qce\\_si](http://140.109.113.226:30000/gristlegrime/qce_si). 2020.
2. F. Weinhold. Quantum cluster equilibrium theory of liquids: General theory and computer implementation. *Journal of Chemical Physics*, 1998.
3. M. J. D. Powell "An efficient method for finding the minimum of a function of several variables without calculating derivatives". *Computer Journal*. 7 (2): 155–162, 1964.
4. G. Matisz, Walter M F Fabian, A. M. Kelterer, and S. Kunsági-Máté. Weinhold's QCE model - A modified parameter fit. Model study of liquid methanol based on MP2 cluster geometries. *Journal of Molecular Structure: THEOCHEM*, 956(1-3):103–109, 2010.
